# Supplementary material for: The neurofilament derived-peptide NFL-TBS.40-63 enters in-vitro in human neural stem cells and increases their differentiation
Source: PubMed Central journal article supplement (PMC6084907; doi:10.1371/journal.pone.0201578), 2018-08-09
Supplement: pone.0201578.s002.pdf [file pone.0201578.s002.pdf]

| Internalisation of the NFL-TBS.40-63 peptide |                            |                    |                 |               |                  |        |
|----------------------------------------------|----------------------------|--------------------|-----------------|---------------|------------------|--------|
|                                              | Control                    | 4°C                | ATP depletion   | Chlorpromazin | Nystatin         | DMA    |
|                                              | 79,54                      | 68,55              | 85,79           | 69            | 72,25            | 70,19  |
|                                              | 74,61                      | 83,13              | 90,84           | 81,3          | 84,98            | 92,75  |
|                                              | 74,83                      | 92,19              | 89,65           | 88,3          | 85,07            | 80,62  |
|                                              | 83,64                      |                    |                 |               |                  |        |
|                                              | 76,4                       |                    |                 |               |                  |        |
| Mean                                         | 77,8                       | 81,29              | 88,76           | 79,53         | 80,77            | 81,19  |
| Tukey's multiple comparisons test            |                            |                    |                 |               |                  |        |
|                                              | Mean Diff.                 | 95.00% CI of diff. | Significant?    | Summary       | Adjusted P Value |        |
|                                              | Control vs. 4°C            | -3,486             | -17,42 to 10,44 | No            | ns               | 0,7618 |
|                                              | Control vs. ATP depletion  | -10,96             | -24,89 to 2,975 | No            | ns               | 0,1223 |
|                                              | 4°C vs. ATP depletion      | -7,47              | -23,05 to 8,105 | No            | ns               | 0,3994 |
| Tukey's multiple comparisons test            |                            |                    |                 |               |                  |        |
|                                              | Mean Diff.                 | 95.00% CI of diff. | Significant?    | Summary       | Adjusted P Value |        |
|                                              | Control vs. Chlorpromazin  | -1,729             | -19,22 to 15,76 | No            | ns               | 0,9898 |
|                                              | Control vs. Nystatin       | -2,963             | -20,45 to 14,53 | No            | ns               | 0,9528 |
|                                              | Control vs. DMA            | -3,383             | -20,87 to 14,11 | No            | ns               | 0,9323 |
|                                              | Chlorpromazin vs. Nystatin | -1,233             | -20,79 to 18,32 | No            | ns               | 0,9973 |
|                                              | Chlorpromazin vs. DMA      | -1,653             | -21,21 to 17,9  | No            | ns               | 0,9935 |
|                                              | Nystatin vs. DMA           | -0,42              | -19,97 to 19,13 | No            | ns               | 0,9999 |

| Cell viability                    |                                           |                    |                    |                    |                    |                    |
|-----------------------------------|-------------------------------------------|--------------------|--------------------|--------------------|--------------------|--------------------|
|                                   | control                                   | taxol              | NFL biot 10 µmol/l | NFL biot 20 µmol/l | NFL biot 40 µmol/l | NFL biot 60 µmol/l |
|                                   | 75,82                                     | 45,68              | 65,36              | 68,39              | 68,11              | 58,73              |
|                                   | 68,27                                     | 56,48              | 85,63              | 67,59              | 47,61              | 44,29              |
|                                   | 67,89                                     | 50,6               |                    | 74,8               | 75,26              | 49,8               |
|                                   | 81,03                                     |                    |                    | 76,3               | 84,99              |                    |
|                                   | 95                                        |                    |                    | 83,4               |                    |                    |
|                                   | 80,4                                      |                    |                    |                    |                    |                    |
|                                   | 80,2                                      |                    |                    |                    |                    |                    |
|                                   | 93,86                                     |                    |                    |                    |                    |                    |
| Mean                              | 80,31                                     | 50,92              | 75,5               | 74,1               | 68,99              | 50,94              |
| Tukey's multiple comparisons test |                                           |                    |                    |                    |                    |                    |
|                                   | Mean Diff.                                | 95.00% CI of diff. | Significant?       | Summary            | Adjusted P Value   |                    |
|                                   | control vs. colchicine                    | 9,689              | -12,01 to 31,39    | No                 | ns                 | 0,8078             |
|                                   | control vs. taxol                         | 29,39              | 7,685 to 51,09     | Yes                | **                 | 0,0034             |
|                                   | control vs. NFL biot 5 µmol/l             | 14,78              | -6,922 to 36,49    | No                 | ns                 | 0,3532             |
|                                   | control vs. NFL biot 10 µmol/l            | 4,814              | -20,53 to 30,16    | No                 | ns                 | 0,998              |
|                                   | control vs. NFL biot 20 µmol/l            | 6,213              | -12,06 to 24,49    | No                 | ns                 | 0,9431             |
|                                   | control vs. NFL biot 40 µmol/l            | 11,32              | -8,315 to 30,95    | No                 | ns                 | 0,5541             |
|                                   | control vs. NFL biot 60 µmol/l            | 29,37              | 7,665 to 51,07     | Yes                | **                 | 0,0034             |
|                                   | colchicine vs. taxol                      | 19,7               | -6,476 to 45,88    | No                 | ns                 | 0,2434             |
|                                   | colchicine vs. NFL biot 5 µmol/l          | 5,093              | -21,08 to 31,27    | No                 | ns                 | 0,9976             |
|                                   | colchicine vs. NFL biot 10 µmol/l         | -4,875             | -34,14 to 24,39    | No                 | ns                 | 0,9991             |
|                                   | colchicine vs. NFL biot 20 µmol/l         | -3,476             | -26,89 to 19,94    | No                 | ns                 | 0,9996             |
|                                   | colchicine vs. NFL biot 40 µmol/l         | 1,628              | -22,86 to 26,11    | No                 | ns                 | >0,9999            |
|                                   | colchicine vs. NFL biot 60 µmol/l         | 19,68              | -6,496 to 45,86    | No                 | ns                 | 0,2444             |
|                                   | taxol vs. NFL biot 5 µmol/l               | -14,61             | -40,78 to 11,57    | No                 | ns                 | 0,592              |
|                                   | taxol vs. NFL biot 10 µmol/l              | -24,58             | -53,84 to 4,69     | No                 | ns                 | 0,1458             |
|                                   | taxol vs. NFL biot 20 µmol/l              | -23,18             | -46,59 to 0,2362   | No                 | ns                 | 0,0537             |
|                                   | taxol vs. NFL biot 40 µmol/l              | -18,07             | -42,56 to 6,413    | No                 | ns                 | 0,2634             |
|                                   | taxol vs. NFL biot 60 µmol/l              | -0,02              | -26,2 to 26,16     | No                 | ns                 | >0,9999            |
|                                   | NFL biot 5 µmol/l vs. NFL biot 10 µmol/l  | -9,968             | -39,23 to 19,3     | No                 | ns                 | 0,9425             |
|                                   | NFL biot 5 µmol/l vs. NFL biot 20 µmol/l  | -8,569             | -31,98 to 14,84    | No                 | ns                 | 0,9186             |
|                                   | NFL biot 5 µmol/l vs. NFL biot 40 µmol/l  | -3,466             | -27,95 to 21,02    | No                 | ns                 | 0,9997             |
|                                   | NFL biot 5 µmol/l vs. NFL biot 60 µmol/l  | 14,59              | -11,59 to 40,76    | No                 | ns                 | 0,5936             |
|                                   | NFL biot 10 µmol/l vs. NFL biot 20 µmol/l | 1,399              | -25,42 to 28,22    | No                 | ns                 | >0,9999            |
|                                   | NFL biot 10 µmol/l vs. NFL biot 40 µmol/l | 6,503              | -21,26 to 34,27    | No                 | ns                 | 0,9927             |
|                                   | NFL biot 10 µmol/l vs. NFL biot 60 µmol/l | 24,56              | -4,71 to 53,82     | No                 | ns                 | 0,1464             |
|                                   | NFL biot 20 µmol/l vs. NFL biot 40 µmol/l | 5,104              | -16,4 to 26,61     | No                 | ns                 | 0,9921             |
|                                   | NFL biot 20 µmol/l vs. NFL biot 60 µmol/l | 23,16              | -0,2562 to 46,57   | No                 | ns                 | 0,054              |
|                                   | NFL biot 40 µmol/l vs. NFL biot 60 µmol/l | 18,05              | -6,433 to 42,54    | No                 | ns                 | 0,2646             |

| Microtubules disruption           |                           |                    |                 |               |                  |         |
|-----------------------------------|---------------------------|--------------------|-----------------|---------------|------------------|---------|
|                                   | control                   | Colchicine         | NFL 20 µmol/l   | NFL 60 µmol/l |                  |         |
|                                   | 13,59                     | 44                 | 10,48           | 10,53         |                  |         |
|                                   | 1,94                      | 30,67              | 12,5            | 12,84         |                  |         |
|                                   | 20                        | 63,11              | 13,71           | 27,66         |                  |         |
|                                   | 10,28                     | 15,84              | 17,92           | 14,95         |                  |         |
|                                   | 15,84                     | 37,84              | 19,05           | 17,82         |                  |         |
|                                   | 12,75                     |                    | 4,85            | 8,57          |                  |         |
|                                   | 21,31                     |                    | 16,5            |               |                  |         |
| Mean                              | 13,67                     | 38,29              | 13,57           | 15,4          |                  |         |
| Tukey's multiple comparisons test |                           |                    |                 |               |                  |         |
|                                   | Mean Diff.                | 95.00% CI of diff. | Significant?    | Summary       | Adjusted P Value |         |
|                                   | control vs. Colchicine    | -24,62             | -39,9 to -9,335 | Yes           | **               | 0,0011  |
|                                   | control vs. NFL 20 µmol/l | 0,1                | -13,85 to 14,05 | No            | ns               | >0,9999 |

|                                 |        |                |     |    |        |
|---------------------------------|--------|----------------|-----|----|--------|
| control vs. NFL 60 µmol/l       | -1,722 | -16,24 to 12,8 | No  | ns | 0,9872 |
| Colchicine vs. NFL 20 µmol/l    | 24,72  | 9,435 to 40    | Yes | ** | 0,001  |
| Colchicine vs. NFL 60 µmol/l    | 22,9   | 7,092 to 38,7  | Yes | ** | 0,0031 |
| NFL 20 µmol/l vs. NFL 60 µmol/l | -1,822 | -16,34 to 12,7 | No  | ns | 0,9849 |

| Cell cycle                                |            |                    |                    |                    |                    |       |
|-------------------------------------------|------------|--------------------|--------------------|--------------------|--------------------|-------|
| G0/G1                                     |            |                    |                    |                    |                    |       |
| control                                   | Colchicine | NFL biot 10 µmol/l | NFL biot 20 µmol/l | NFL biot 40 µmol/l | NFL biot 60 µmol/l |       |
| 73                                        | 60,8       | 67,4               | 74,8               | 68,2               | 71,4               |       |
| 79,6                                      | 56,8       | 78,2               | 55,6               | 77                 | 76,2               |       |
| 95                                        | 61,6       | 80,8               | 61,6               | 67,2               | 79,2               |       |
| 86,8                                      | 74,6       | 84,2               | 78                 | 83,2               | 79,4               |       |
| 63                                        | 75,6       | 52,2               | 63,8               | 58,8               | 55                 |       |
| 85,8                                      | 79,6       |                    | 77,2               |                    |                    |       |
| Mean                                      | 80,53      | 68,17              | 72,56              | 68,5               | 70,88              | 72,24 |
| S                                         |            |                    |                    |                    |                    |       |
| control                                   | Colchicine | NFL biot 10 µmol/l | NFL biot 20 µmol/l | NFL biot 40 µmol/l | NFL biot 60 µmol/l |       |
| 22,2                                      | 24,8       | 26,4               | 20,2               | 21,2               | 19,8               |       |
| 15,4                                      | 24,6       | 14,6               | 35,6               | 16,8               | 20,2               |       |
| 0                                         | 29,4       | 9,8                | 16,8               | 19,4               | 5,2                |       |
| 7,2                                       | 6,8        | 5,8                | 5,4                | 2,6                | 9,8                |       |
| 27,4                                      | 9,8        | 34,4               | 24,4               | 37,6               | 32,6               |       |
| 9,2                                       | 13,4       |                    | 18                 |                    |                    |       |
| Mean                                      | 13,57      | 18,13              | 18,2               | 20,07              | 19,52              | 17,52 |
| G2/M                                      |            |                    |                    |                    |                    |       |
| control                                   | Colchicine | NFL biot 10 µmol/l | NFL biot 20 µmol/l | NFL biot 40 µmol/l | NFL biot 60 µmol/l |       |
| 4,8                                       | 14,4       | 6,2                | 5                  | 21,2               | 8,8                |       |
| 5                                         | 18,6       | 7,2                | 8,8                | 6,2                | 3,6                |       |
| 5                                         | 9          | 9,4                | 21,6               | 13,4               | 15,6               |       |
| 6                                         | 18,6       | 10                 | 16,6               | 14,2               | 10,8               |       |
| 9,6                                       | 14,6       | 13,4               | 11,8               | 3,6                | 12,4               |       |
| 5                                         | 3,5        |                    | 2,4                |                    |                    |       |
| Mean                                      | 5,9        | 13,12              | 9,24               | 11,03              | 11,72              | 10,24 |
| Tukey's multiple comparisons test         |            |                    |                    |                    |                    |       |
| G0/G1                                     | Mean Diff, | 95,00% CI of diff, | Significant?       | Summary            | Adjusted P Value   |       |
| Control vs. Colchicine                    | 12,37      | -3,094 to 27,83    | No                 | ns                 | 0,1924             |       |
| Control vs. NFL biot 10 µmol/l            | 7,973      | -8,242 to 24,19    | No                 | ns                 | 0,7055             |       |
| Control vs. NFL biot 20 µmol/l            | 12,03      | -3,428 to 27,49    | No                 | ns                 | 0,2176             |       |
| Control vs. NFL biot 40 µmol/l            | 9,653      | -6,562 to 25,87    | No                 | ns                 | 0,5114             |       |
| Control vs. NFL biot 60 µmol/l            | 8,293      | -7,922 to 24,51    | No                 | ns                 | 0,6697             |       |
| Colchicine vs. NFL biot 10 µmol/l         | -4,393     | -20,61 to 11,82    | No                 | ns                 | 0,9683             |       |
| Colchicine vs. NFL biot 20 µmol/l         | -0,3333    | -15,79 to 15,13    | No                 | ns                 | >0,9999            |       |
| Colchicine vs. NFL biot 40 µmol/l         | -2,713     | -18,93 to 13,5     | No                 | ns                 | 0,9965             |       |
| Colchicine vs. NFL biot 60 µmol/l         | -4,073     | -20,29 to 12,14    | No                 | ns                 | 0,9772             |       |
| NFL biot 10 µmol/l vs. NFL biot 20 µmol/l | 4,06       | -12,16 to 20,28    | No                 | ns                 | 0,9775             |       |
| NFL biot 10 µmol/l vs. NFL biot 40 µmol/l | 1,68       | -15,26 to 18,62    | No                 | ns                 | 0,9997             |       |
| NFL biot 10 µmol/l vs. NFL biot 60 µmol/l | 0,32       | -16,62 to 17,26    | No                 | ns                 | >0,9999            |       |
| NFL biot 20 µmol/l vs. NFL biot 40 µmol/l | -2,38      | -18,6 to 13,84     | No                 | ns                 | 0,9981             |       |
| NFL biot 20 µmol/l vs. NFL biot 60 µmol/l | -3,74      | -19,96 to 12,48    | No                 | ns                 | 0,9844             |       |
| NFL biot 40 µmol/l vs. NFL biot 60 µmol/l | -1,36      | -18,3 to 15,58     | No                 | ns                 | 0,9999             |       |
| S                                         |            |                    |                    |                    |                    |       |
| Control vs. Colchicine                    | -4,567     | -20,03 to 10,89    | No                 | ns                 | 0,9543             |       |
| Control vs. NFL biot 10 µmol/l            | -4,633     | -20,85 to 11,58    | No                 | ns                 | 0,9603             |       |
| Control vs. NFL biot 20 µmol/l            | -6,5       | -21,96 to 8,961    | No                 | ns                 | 0,8223             |       |
| Control vs. NFL biot 40 µmol/l            | -5,953     | -22,17 to 10,26    | No                 | ns                 | 0,8912             |       |
| Control vs. NFL biot 60 µmol/l            | -3,953     | -20,17 to 12,26    | No                 | ns                 | 0,98               |       |
| Colchicine vs. NFL biot 10 µmol/l         | -0,06667   | -16,28 to 16,15    | No                 | ns                 | >0,9999            |       |
| Colchicine vs. NFL biot 20 µmol/l         | -1,933     | -17,39 to 13,53    | No                 | ns                 | 0,9991             |       |
| Colchicine vs. NFL biot 40 µmol/l         | -1,387     | -17,6 to 14,83     | No                 | ns                 | 0,9999             |       |
| Colchicine vs. NFL biot 60 µmol/l         | 0,6133     | -15,6 to 16,83     | No                 | ns                 | >0,9999            |       |
| NFL biot 10 µmol/l vs. NFL biot 20 µmol/l | -1,867     | -18,08 to 14,35    | No                 | ns                 | 0,9994             |       |
| NFL biot 10 µmol/l vs. NFL biot 40 µmol/l | -1,32      | -18,26 to 15,62    | No                 | ns                 | >0,9999            |       |
| NFL biot 10 µmol/l vs. NFL biot 60 µmol/l | 0,68       | -16,26 to 17,62    | No                 | ns                 | >0,9999            |       |
| NFL biot 20 µmol/l vs. NFL biot 40 µmol/l | 0,5467     | -15,67 to 16,76    | No                 | ns                 | >0,9999            |       |
| NFL biot 20 µmol/l vs. NFL biot 60 µmol/l | 2,547      | -13,67 to 18,76    | No                 | ns                 | 0,9974             |       |
| NFL biot 40 µmol/l vs. NFL biot 60 µmol/l | 2          | -14,94 to 18,94    | No                 | ns                 | 0,9993             |       |
| G2/M                                      |            |                    |                    |                    |                    |       |
| Control vs. Colchicine                    | -7,217     | -22,68 to 8,244    | No                 | ns                 | 0,749              |       |
| Control vs. NFL biot 10 µmol/l            | -3,34      | -19,56 to 12,88    | No                 | ns                 | 0,9907             |       |
| Control vs. NFL biot 20 µmol/l            | -5,133     | -20,59 to 10,33    | No                 | ns                 | 0,9263             |       |
| Control vs. NFL biot 40 µmol/l            | -5,82      | -22,04 to 10,4     | No                 | ns                 | 0,9001             |       |
| Control vs. NFL biot 60 µmol/l            | -4,34      | -20,56 to 11,88    | No                 | ns                 | 0,97               |       |
| Colchicine vs. NFL biot 10 µmol/l         | 3,877      | -12,34 to 20,09    | No                 | ns                 | 0,9817             |       |
| Colchicine vs. NFL biot 20 µmol/l         | 2,083      | -13,38 to 17,54    | No                 | ns                 | 0,9987             |       |
| Colchicine vs. NFL biot 40 µmol/l         | 1,397      | -14,82 to 17,61    | No                 | ns                 | 0,9999             |       |
| Colchicine vs. NFL biot 60 µmol/l         | 2,877      | -13,34 to 19,09    | No                 | ns                 | 0,9953             |       |
| NFL biot 10 µmol/l vs. NFL biot 20 µmol/l | -1,793     | -18,01 to 14,42    | No                 | ns                 | 0,9995             |       |
| NFL biot 10 µmol/l vs. NFL biot 40 µmol/l | -2,48      | -19,42 to 14,46    | No                 | ns                 | 0,9981             |       |
| NFL biot 10 µmol/l vs. NFL biot 60 µmol/l | -1         | -17,94 to 15,94    | No                 | ns                 | >0,9999            |       |
| NFL biot 20 µmol/l vs. NFL biot 40 µmol/l | -0,6867    | -16,9 to 15,53     | No                 | ns                 | >0,9999            |       |
| NFL biot 20 µmol/l vs. NFL biot 60 µmol/l | 0,7933     | -15,42 to 17,01    | No                 | ns                 | >0,9999            |       |
| NFL biot 40 µmol/l vs. NFL biot 60 µmol/l | 1,48       | -15,46 to 18,42    | No                 | ns                 | 0,9998             |       |

| Proliferation - Trypan blue |            |                    |                    |                    |                    |  |
|-----------------------------|------------|--------------------|--------------------|--------------------|--------------------|--|
| Control                     | Colchicine | NFL biot 10 µmol/l | NFL biot 20 µmol/l | NFL biot 40 µmol/l | NFL biot 60 µmol/l |  |
| 99,9                        | 40         | 125,714            | 125,71             | 102,857            | 17,143             |  |
| 100                         | 34,286     | 125,714            | 85,714             | 57,143             | 40                 |  |
| 100                         | 38,095     | 57,143             | 19,048             | 14,286             | 9,524              |  |
| 100                         | 93,36735   | 102,551            | 39,79592           | 42,85714           | 53,57143           |  |
| 100                         | 3,684211   | 83,87096           | 65,43779           | 85,71429           | 72,81106           |  |
| 100                         | 33,33      | 43,15789           | 20                 | 7,631579           | 0,7894737          |  |
| 100                         | 44,44      | 77,23              | 11,88              | 1,98               | 0,79               |  |
| 100                         | 9,52       | 89,11              | 13,86              | 2,18               | 1,19               |  |
| 100                         | 19,05      |                    |                    |                    |                    |  |

|      |                                           |            |                    |              |         |                  |
|------|-------------------------------------------|------------|--------------------|--------------|---------|------------------|
| Mean | 100                                       |            |                    |              |         |                  |
|      | 100                                       | 35,09      | 88,06              | 47,68        | 39,33   | 24,48            |
|      | Tukey's multiple comparisons test         | Mean Diff. | 95,00% CI of diff. | Significant? | Summary | Adjusted P Value |
|      | Control vs. Colchicine                    | 64,91      | 24,26 to 105,6     | Yes          | ***     | 0,0003           |
|      | Control vs. NFL biot 10 µmol/l            | 11,94      | -30,04 to 53,91    | No           | ns      | 0,9569           |
|      | Control vs. NFL biot 20 µmol/l            | 52,32      | 10,34 to 94,29     | Yes          | **      | 0,0071           |
|      | Control vs. NFL biot 40 µmol/l            | 60,67      | 18,69 to 102,6     | Yes          | **      | 0,0012           |
|      | Control vs. NFL biot 60 µmol/l            | 75,52      | 33,55 to 117,5     | Yes          | ****    | <0,0001          |
|      | Colchicine vs. NFL biot 10 µmol/l         | -52,98     | -95,97 to -9,978   | Yes          | **      | 0,008            |
|      | Colchicine vs. NFL biot 20 µmol/l         | -12,59     | -55,59 to 30,4     | No           | ns      | 0,9513           |
|      | Colchicine vs. NFL biot 40 µmol/l         | -4,245     | -47,24 to 38,75    | No           | ns      | 0,9997           |
|      | Colchicine vs. NFL biot 60 µmol/l         | 10,61      | -32,39 to 53,61    | No           | ns      | 0,9766           |
|      | NFL biot 10 µmol/l vs. NFL biot 20 µmol/l | 40,38      | -3,863 to 84,62    | No           | ns      | 0,0918           |
|      | NFL biot 10 µmol/l vs. NFL biot 40 µmol/l | 48,73      | 4,486 to 92,97     | Yes          | *       | 0,0232           |
|      | NFL biot 10 µmol/l vs. NFL biot 60 µmol/l | 63,58      | 19,34 to 107,8     | Yes          | **      | 0,0013           |
|      | NFL biot 20 µmol/l vs. NFL biot 40 µmol/l | 8,35       | -35,89 to 52,59    | No           | ns      | 0,993            |
|      | NFL biot 20 µmol/l vs. NFL biot 60 µmol/l | 23,2       | -21,04 to 67,45    | No           | ns      | 0,6278           |
|      | NFL biot 40 µmol/l vs. NFL biot 60 µmol/l | 14,85      | -29,39 to 59,1     | No           | ns      | 0,9158           |

| Proliferation - CyQUANT |            |                    |                    |                    |                    |       |
|-------------------------|------------|--------------------|--------------------|--------------------|--------------------|-------|
| Control                 | Colchicine | NFL biot 10 µmol/l | NFL biot 20 µmol/l | NFL biot 40 µmol/l | NFL biot 60 µmol/l |       |
| 368,14                  |            | 234,43             | 111,46             | 62,43              | 63,85              |       |
| 297,32                  |            | 261,18             | 226,99             | 125,35             | 61,36              |       |
| 243,58                  |            | 220,08             | 86,54              | 69,09              |                    |       |
| 113,0857                | 78,32066   | 125,4407           | 139,9327           | 78,92567           | 74,68066           |       |
| 180,1417                |            | 146,0257           | 129,6877           | 107,1497           | 100,6827           |       |
| 230,0067                |            | 283,7047           | 157,9677           | 160,7077           | 128,4907           |       |
| 68,256                  | 41,865     | 36,216             | 51,94              | 39,389             | 48,017             |       |
|                         | 61,807     | 70,947             | 96,539             | 77,825             | 97,39              |       |
|                         |            | 60,772             | 124,615            | 152,791            | 79,599             |       |
| 20,57967                | 34,62567   | 77,11867           | 14,48867           | 0,9026667          | 0,8646666          |       |
| 55,10266                | 26,46267   | 50,21067           | 14,34367           | 6,604667           | 1,466667           |       |
| 54,42367                | 28,63067   | 57,56867           | 13,52367           | 7,846667           | 1,141667           |       |
| 103,2383                | 111,8423   | 109,0853           | 106,5843           | 107,8413           | 81,00833           |       |
|                         | 17,08733   | 150,1713           | 148,3833           | 32,07133           | 94,47833           |       |
| 26,86333                |            | 22,94133           | 16,72733           | 59,60433           | 27,69633           |       |
| 82,318                  | 43,146     | 58,572             | 46,745             | 28,909             | 5,305              |       |
| 42,827                  | 42,319     | 27,996             | 26,307             | 16,918             | 4,66               |       |
| 45,733                  | 47,777     | 70,071             | 37,819             | 17,667             | 21,519             |       |
| 115,47                  | 105,225    | 165,198            | 83,204             | 21,548             | 12,454             |       |
| 97,646                  | 97,135     | 102,775            | 61,16              | 26,019             | 7,358              |       |
| 75,935                  | 77,201     | 128,513            | 146,103            | 40,357             | 20,976             |       |
| 74,347                  | 72,609     | 101,918            | 88,804             | 58,233             | 43,578             |       |
| 96,465                  | 78,681     | 113,978            | 111,602            | 62,109             | 33,798             |       |
| 68,848                  | 75,217     | 112,225            | 88,968             | 51,2               | 30,197             |       |
|                         | 42,7       | 110,43             | 91,51              | 93,11              | 103                |       |
|                         | 46,83      | 109,64             | 79,74              | 88,56              | 102,9              |       |
| Mean                    | 117,2      | 59,45              | 115,7              | 88,53              | 61,28              | 49,86 |

|  |                                           |            |                    |              |         |                  |
|--|-------------------------------------------|------------|--------------------|--------------|---------|------------------|
|  | Tukey's multiple comparisons test         | Mean Diff. | 95,00% CI of diff. | Significant? | Summary | Adjusted P Value |
|  | Control vs. Colchicine                    | 57,71      | 4,286 to 111,1     | Yes          | *       | 0,0261           |
|  | Control vs. NFL biot 10 µmol/l            | 1,497      | -48,01 to 51       | No           | ns      | >0,9999          |
|  | Control vs. NFL biot 20 µmol/l            | 28,63      | -20,87 to 78,14    | No           | ns      | 0,5528           |
|  | Control vs. NFL biot 40 µmol/l            | 55,88      | 6,377 to 105,4     | Yes          | *       | 0,0172           |
|  | Control vs. NFL biot 60 µmol/l            | 67,3       | 17,35 to 117,2     | Yes          | **      | 0,0021           |
|  | Colchicine vs. NFL biot 10 µmol/l         | -56,22     | -107,1 to -5,288   | Yes          | *       | 0,0213           |
|  | Colchicine vs. NFL biot 20 µmol/l         | -29,08     | -80,01 to 21,85    | No           | ns      | 0,5668           |
|  | Colchicine vs. NFL biot 40 µmol/l         | -1,829     | -52,76 to 49,1     | No           | ns      | >0,9999          |
|  | Colchicine vs. NFL biot 60 µmol/l         | 9,588      | -41,77 to 60,94    | No           | ns      | 0,9944           |
|  | NFL biot 10 µmol/l vs. NFL biot 20 µmol/l | 27,14      | -19,66 to 73,93    | No           | ns      | 0,55             |
|  | NFL biot 10 µmol/l vs. NFL biot 40 µmol/l | 54,39      | 7,588 to 101,2     | Yes          | *       | 0,0127           |
|  | NFL biot 10 µmol/l vs. NFL biot 60 µmol/l | 65,8       | 18,54 to 113,1     | Yes          | **      | 0,0013           |
|  | NFL biot 20 µmol/l vs. NFL biot 40 µmol/l | 27,25      | -19,55 to 74,05    | No           | ns      | 0,5453           |
|  | NFL biot 20 µmol/l vs. NFL biot 60 µmol/l | 38,67      | -8,597 to 85,93    | No           | ns      | 0,1762           |
|  | NFL biot 40 µmol/l vs. NFL biot 60 µmol/l | 11,42      | -35,85 to 58,68    | No           | ns      | 0,9819           |

| BrdU incorporation |            |                    |                    |                    |                    |      |
|--------------------|------------|--------------------|--------------------|--------------------|--------------------|------|
| Control            | Colchicine | NFL Biot 10 µmol/l | NFL Biot 20 µmol/l | NFL Biot 40 µmol/l | NFL Biot 60 µmol/l |      |
| 0,135              | 0,091      | 0,343              | 0,683              | 0,482              | 0,591              |      |
| 0,202              | 0,063      | 0,107              | 0,853              | 0,399              | 0,32               |      |
| 0,102              | 0,125      | 0,141              | 0,489              | 0,464              | 0,493              |      |
| -0,023             | -0,039     | 0,578              | 0,704              | 0,668              | 0,506              |      |
| 0,033              | -0,065     | 0,584              | 0,519              | 0,684              | 0,84               |      |
| 0,049              | -0,044     | 0,392              | 0,254              | 0,452              | 0,296              |      |
| Mean               | 1          | -1,139             | 9,365              | 2,653              | 1,22               | 0,92 |

|  |                                           |            |                    |              |         |                  |
|--|-------------------------------------------|------------|--------------------|--------------|---------|------------------|
|  | Tukey's multiple comparisons test         | Mean Diff. | 95,00% CI of diff. | Significant? | Summary | Adjusted P Value |
|  | Control vs. Colchicine                    | 2,139      | -7,669 to 11,95    | No           | ns      | 0,9853           |
|  | Control vs. NFL Biot 10 µmol/l            | -8,365     | -18,17 to 1,444    | No           | ns      | 0,1317           |
|  | Control vs. NFL Biot 20 µmol/l            | -1,653     | -16,64 to 13,33    | No           | ns      | 0,9994           |
|  | Control vs. NFL Biot 40 µmol/l            | -0,22      | -17,9 to 17,46     | No           | ns      | >0,9999          |
|  | Control vs. NFL Biot 60 µmol/l            | 0,08       | -17,6 to 17,76     | No           | ns      | >0,9999          |
|  | Colchicine vs. NFL Biot 10 µmol/l         | -10,5      | -20,31 to -0,6953  | Yes          | *       | 0,03             |
|  | Colchicine vs. NFL Biot 20 µmol/l         | -3,792     | -18,77 to 11,19    | No           | ns      | 0,9717           |
|  | Colchicine vs. NFL Biot 40 µmol/l         | -2,359     | -20,04 to 15,32    | No           | ns      | 0,9985           |
|  | Colchicine vs. NFL Biot 60 µmol/l         | -2,059     | -19,74 to 15,62    | No           | ns      | 0,9992           |
|  | NFL Biot 10 µmol/l vs. NFL Biot 20 µmol/l | 6,711      | -8,271 to 21,69    | No           | ns      | 0,7543           |
|  | NFL Biot 10 µmol/l vs. NFL Biot 40 µmol/l | 8,145      | -9,538 to 25,83    | No           | ns      | 0,7324           |
|  | NFL Biot 10 µmol/l vs. NFL Biot 60 µmol/l | 8,445      | -9,238 to 26,13    | No           | ns      | 0,7022           |
|  | NFL Biot 20 µmol/l vs. NFL Biot 40 µmol/l | 1,433      | -19,56 to 22,43    | No           | ns      | >0,9999          |
|  | NFL Biot 20 µmol/l vs. NFL Biot 60 µmol/l | 1,733      | -19,26 to 22,73    | No           | ns      | 0,9999           |
|  | NFL Biot 40 µmol/l vs. NFL Biot 60 µmol/l | 0,3        | -22,7 to 23,3      | No           | ns      | >0,9999          |

| EdU incorporation |           |                    |                    |                    |                    |
|-------------------|-----------|--------------------|--------------------|--------------------|--------------------|
| Control           | Colchicin | NFL-TBS.40-63 10 M | NFL-TBS.40-63 20 M | NFL-TBS.40-63 40 M | NFL-TBS.40-63 60 M |
| 5,8               | 0,2       | 11,8               | 64,4               | 13,7               | 40                 |
| 48                | 0,3       | 23,4               | 13,5               | 64                 | 65,8               |

|      |      |      |       |       |       |       |
|------|------|------|-------|-------|-------|-------|
|      | 42,6 | 1,4  | 25    | 11,7  | 73,8  | 84,2  |
|      | 30,2 | 0,7  | 40,6  | 84,3  | 10,3  | 14,4  |
|      | 17,8 |      | 42,4  | 19,1  | 86,9  | 98,2  |
|      | 3,8  |      | 53    | 91,8  | 12,3  | 26,5  |
|      |      |      | 16,3  | 66    | 91,1  | 81,1  |
|      |      |      |       |       | 92,2  | 88,8  |
| Mean | 24,7 | 0,65 | 30,36 | 50,11 | 55,54 | 62,38 |

| Tukey's multiple comparisons test         | Mean Diff. | 95.00% CI of diff. | Significant? | Summary | Adjusted P Value |
|-------------------------------------------|------------|--------------------|--------------|---------|------------------|
| Control vs. Colchicine                    | 24,05      | -30,68 to 78,78    | No           | ns      | 0,7686           |
| Control vs. NFL biot 10 µmol/l            | -5,657     | -52,83 to 41,52    | No           | ns      | 0,9991           |
| Control vs. NFL biot 20 µmol/l            | -25,41     | -72,59 to 21,76    | No           | ns      | 0,5877           |
| Control vs. NFL biot 40 µmol/l            | -30,84     | -76,63 to 14,95    | No           | ns      | 0,3459           |
| Control vs. NFL biot 60 µmol/l            | -37,68     | -83,47 to 8,117    | No           | ns      | 0,1576           |
| Colchicine vs. NFL biot 10 µmol/l         | -29,71     | -82,85 to 23,44    | No           | ns      | 0,5492           |
| Colchicine vs. NFL biot 20 µmol/l         | -49,46     | -102,6 to 3,68     | No           | ns      | 0,0802           |
| Colchicine vs. NFL biot 40 µmol/l         | -54,89     | -106,8 to -2,965   | Yes          | *       | 0,0332           |
| Colchicine vs. NFL biot 60 µmol/l         | -61,73     | -113,6 to -9,802   | Yes          | *       | 0,0122           |
| NFL biot 10 µmol/l vs. NFL biot 20 µmol/l | -19,76     | -65,08 to 25,56    | No           | ns      | 0,7744           |
| NFL biot 10 µmol/l vs. NFL biot 40 µmol/l | -25,18     | -69,06 to 18,7     | No           | ns      | 0,5212           |
| NFL biot 10 µmol/l vs. NFL biot 60 µmol/l | -32,02     | -75,9 to 11,86     | No           | ns      | 0,2632           |
| NFL biot 20 µmol/l vs. NFL biot 40 µmol/l | -5,423     | -49,31 to 38,46    | No           | ns      | 0,999            |
| NFL biot 20 µmol/l vs. NFL biot 60 µmol/l | -12,26     | -56,14 to 31,62    | No           | ns      | 0,957            |
| NFL biot 40 µmol/l vs. NFL biot 60 µmol/l | -6,838     | -49,23 to 35,56    | No           | ns      | 0,9963           |

| Self-renewal      |            |                    |                    |                    |                    |        |
|-------------------|------------|--------------------|--------------------|--------------------|--------------------|--------|
| Number of spheres |            |                    |                    |                    |                    |        |
| Control           | Colchicine | NFL biot 10 µmol/l | NFL biot 20 µmol/l | NFL biot 40 µmol/l | NFL biot 60 µmol/l |        |
| 111,11            | 555,56     | 333,33             | 222,22             | 111,11             | 111,11             | 111,11 |
| 444,44            | 0          | 333,33             | 222,22             | 222,22             | 111,11             | 111,11 |
| 0                 | 0          | 444,44             | 222,22             | 111,11             | 222,22             | 222,22 |
| 777,78            | 222,22     | 444,44             | 222,22             | 333,33             | 111,11             | 111,11 |
| 2000              | 0          | 555,56             | 444,44             | 333,33             | 0                  | 0      |
| 222,22            | 111,11     | 333,33             | 222,22             | 333,33             | 0                  | 0      |
| 222,22            | 0          | 333,33             | 444,44             | 333,33             | 0                  | 0      |
| 444,44            | 222,22     | 444,44             | 555,56             | 111,11             | 0                  | 0      |
| 666,67            | 111,11     | 222,22             | 444,44             | 111,11             | 0                  | 0      |
| 111,11            | 0          | 555,56             | 333,33             | 222,22             | 0                  | 0      |
| 444,44            | 0          | 444,44             | 333,33             | 222,22             | 0                  | 0      |
| 222,22            | 222,22     | 666,67             | 222,22             | 111,11             | 0                  | 0      |
| 444,44            | 222,22     | 111,11             | 333,33             | 222,22             | 0                  | 0      |
| 555,56            | 0          | 666,67             | 111,11             | 222,22             | 0                  | 0      |
| 333,33            | 0          | 333,33             | 0                  | 0                  | 0                  | 0      |
| 111,11            | 0          | 444,44             | 0                  | 0                  | 0                  | 0      |
| 444,44            | 229,63     | 194,44             | 111,11             | 111,11             | 111,11             | 111,11 |
| 333,33            | 153,85     | 384,62             | 444,44             | 111,11             | 0                  | 0      |
| 555,56            | 307,69     | 769,23             | 222,22             | 111,11             | 0                  | 0      |
| 444,44            | 76,92      | 769,23             | 222,22             | 0                  | 0                  | 0      |
| 444,44            | 461,54     | 461,54             | 111,11             | 0                  | 0                  | 0      |
| 222,22            | 384,62     | 384,62             | 111,11             | 0                  | 0                  | 0      |
| 222,22            | 923,08     | 153,85             | 111,11             | 0                  | 0                  | 0      |
| 444,44            | 76,92      | 769,23             | 222,22             | 0                  | 0                  | 0      |
| 444,44            | 461,54     | 1692,31            | 444,44             | 0                  | 0                  | 0      |
| 444,44            | 307,69     | 461,54             | 222,22             | 0                  | 0                  | 0      |
| 111,11            | 230,77     | 461,54             | 0                  | 0                  | 0                  | 0      |
| 333,33            | 923,08     | 384,62             | 0                  | 0                  | 0                  | 0      |
| 222,22            | 538,46     | 538,46             | 0                  | 15,87              | 14,81              | 14,81  |
| 222,22            | 153,85     | 692,31             | 44,44              | 307,69             | 76,92              | 76,92  |
| 222,22            | 76,92      | 615,38             | 153,85             | 230,77             | 230,77             | 230,77 |
| 762,96            | 153,85     | 538,46             | 76,92              | 76,92              | 76,92              | 76,92  |
| 384,62            | 230,77     | 1076,92            | 153,85             | 76,92              | 76,92              | 76,92  |
| 384,62            | 307,69     | 692,31             | 76,92              | 307,69             | 76,92              | 76,92  |
| 307,69            | 230,77     | 1076,92            | 307,69             | 76,92              | 153,85             | 153,85 |
| 461,54            | 153,85     | 461,54             | 153,85             | 153,85             | 153,85             | 153,85 |
| 384,62            | 153,85     | 538,46             | 76,92              | 76,92              | 76,92              | 76,92  |
| 384,62            | 0          | 461,54             | 692,31             | 76,92              | 76,92              | 76,92  |
| 923,08            | 0          | 769,23             | 307,69             | 76,92              | 153,85             | 153,85 |
| 307,69            | 0          | 769,23             | 153,85             | 153,85             | 76,92              | 76,92  |
| 307,69            | 0          | 923,08             | 384,62             | 307,69             | 153,85             | 153,85 |
| 307,69            | 0          | 846,15             | 153,85             | 230,77             | 230,77             | 230,77 |
| 230,77            | 0          | 76,92              | 307,69             | 153,85             | 0                  | 0      |
| 461,54            | 76,92      | 76,92              | 384,62             | 230,77             | 0                  | 0      |
| 538,46            | 0          | 153,85             | 307,69             | 153,85             | 0                  | 0      |
| 307,69            | 0          | 0                  | 76,92              | 0                  | 0                  | 0      |
| 615,38            | 0          | 0                  | 307,69             | 0                  | 0                  | 0      |
| 461,54            | 0          | 0                  | 153,85             | 0                  | 0                  | 0      |
| 384,62            | 0          | 0                  | 153,85             | 0                  | 0                  | 0      |
| 538,46            | 0          | 0                  | 76,92              | 0                  | 0                  | 0      |
| 307,69            | 0          | 0                  | 461,54             | 0                  | 0                  | 0      |
| 615,38            | 0          | 0                  | 153,85             | 0                  | 0                  | 0      |
| 384,62            | 0          | 0                  | 153,85             | 0                  | 153,85             | 153,85 |
| 384,62            | 0          | 0                  | 307,69             | 0                  | 76,92              | 76,92  |
| 384,62            | 0          | 0                  | 76,92              | 76,92              | 0                  | 0      |
| 461,54            | 76,92      | 76,92              | 0                  | 0                  | 0                  | 0      |
| 0                 | 0          | 0                  | 0                  | 153,85             | 0                  | 0      |
| 230,77            | 0          | 0                  | 0                  | 0                  | 153,85             | 153,85 |
| 76,92             | 0          | 153,85             | 0                  | 0                  | 0                  | 0      |
| 76,92             | 0          | 76,92              | 0                  | 0                  | 0                  | 0      |
| 76,92             | 0          | 153,85             | 0                  | 230,77             | 0                  | 0      |
| 76,92             | 0          | 76,92              | 0                  | 76,92              | 0                  | 0      |
| 230,77            | 0          | 0                  | 0                  | 0                  | 0                  | 0      |
| 0                 | 0          | 0                  | 0                  | 230,77             | 0                  | 0      |

|        |        |        |       |        |       |       |
|--------|--------|--------|-------|--------|-------|-------|
| 0      | 76,92  | 0      | 0     | 153,85 | 76,92 |       |
| 0      | 0      | 230,77 | 0     | 76,92  | 0     |       |
| 0      | 76,92  | 76,92  | 0     | 0      | 0     |       |
| 76,92  | 0      | 76,92  | 0     | 76,92  | 76,92 |       |
| 230,77 | 0      | 0      | 0     | 0      | 0     |       |
| 538,46 | 0      | 0      | 0     | 0      | 0     |       |
| 0      | 0      | 230,77 | 0     | 0      | 0     |       |
| 153,85 | 0      | 0      | 0     | 0      | 0     |       |
| 76,92  | 0      | 230,77 | 0     | 0      | 0     |       |
| 76,92  | 0      | 153,85 | 0     | 0      | 0     |       |
| 153,85 | 0      | 76,92  | 0     | 0      | 0     |       |
| 846,15 | 153,85 | 76,92  | 0     | 0      | 0     |       |
| 76,92  | 76,92  | 76,92  | 0     | 0      | 0     |       |
| 692,31 | 0      | 76,92  | 0     | 0      | 0     |       |
| 76,92  | 76,92  | 76,92  | 0     | 76,92  | 0     |       |
| 76,92  | 76,92  | 230,77 | 0     | 0      | 0     |       |
| 0      | 0      | 153,85 | 0     | 76,92  | 0     |       |
| 0      | 76,92  | 76,92  | 0     | 76,92  | 0     |       |
| 0      | 76,92  | 230,77 | 0     | 0      | 0     |       |
| 0      | 76,92  | 153,85 | 0     | 76,92  | 0     |       |
| 76,92  | 153,85 | 76,92  | 0     | 0      | 0     |       |
| 0      | 76,92  | 76,92  | 0     | 0      | 0     |       |
| 0      | 76,92  | 76,92  | 0     | 0      | 0     |       |
| 0      | 230,77 | 76,92  | 0     | 0      | 0     |       |
| 76,92  | 0      | 153,85 | 0     | 0      | 0     |       |
| 0      | 0      | 76,92  | 0     | 0      | 0     |       |
| 0      | 0      | 153,85 | 0     | 0      | 0     |       |
| 0      | 0      | 76,92  | 0     | 0      | 0     |       |
| 0      | 76,92  | 76,92  | 0     | 0      | 0     |       |
| 692,31 | 76,92  | 0      | 0     | 0      | 0     |       |
| 615,38 | 0      | 0      | 0     | 0      | 0     |       |
| 76,92  | 0      | 0      | 0     | 0      | 0     |       |
| 0      | 0      | 0      | 0     | 0      | 0     |       |
| 153,85 | 76,92  | 0      | 0     | 0      | 0     |       |
| 153,85 | 0      | 0      | 0     | 0      | 0     |       |
| 0      | 76,92  | 0      | 0     | 0      | 0     |       |
| 153,85 | 153,85 | 0      | 0     | 0      | 0     |       |
| 76,92  | 0      | 0      | 0     | 0      | 0     |       |
| 76,92  | 0      | 0      | 0     | 0      | 0     |       |
| 0      | 0      | 0      | 0     | 0      | 0     |       |
| 76,92  | 76,92  | 0      | 0     | 0      | 0     |       |
| 76,92  | 0      | 0      | 0     | 0      | 0     |       |
| 0      | 0      | 0      | 0     | 0      | 0     |       |
| 0      | 0      | 0      | 0     | 0      | 0     |       |
| 0      | 0      | 0      | 0     | 0      | 0     |       |
| 0      | 0      | 0      | 0     | 0      | 0     |       |
| 76,92  | 0      | 0      | 0     | 0      | 0     |       |
| 0      | 0      | 0      | 0     | 0      | 0     |       |
| 0      | 0      | 0      | 0     | 0      | 0     |       |
| 0      | 0      | 0      | 0     | 0      | 0     |       |
| 153,85 | 0      | 0      | 0     | 0      | 0     |       |
| 76,92  | 0      | 0      | 0     | 0      | 0     |       |
| 76,92  | 0      | 0      | 0     | 0      | 0     |       |
| 76,92  | 0      | 0      | 0     | 0      | 0     |       |
| 0      | 0      | 0      | 0     | 0      | 0     |       |
| 76,92  | 0      | 0      | 0     | 0      | 0     |       |
| 0      | 0      | 0      | 0     | 0      | 0     |       |
| 76,92  | 0      | 0      | 0     | 0      | 0     |       |
| 76,92  | 0      | 0      | 0     | 0      | 0     |       |
| 153,85 | 0      | 0      | 0     | 0      | 0     |       |
| 0      | 0      | 0      | 0     | 0      | 0     |       |
| 153,85 | 0      | 0      | 0     | 0      | 0     |       |
| 307,69 | 0      | 0      | 0     | 0      | 0     |       |
| 0      | 0      | 0      | 0     | 0      | 0     |       |
| 153,85 | 0      | 0      | 0     | 0      | 0     |       |
| 153,85 | 0      | 0      | 0     | 0      | 0     |       |
| 76,92  | 0      | 0      | 0     | 0      | 0     |       |
| 230,77 | 0      | 0      | 0     | 0      | 0     |       |
| 76,92  | 0      | 0      | 0     | 0      | 0     |       |
| 76,92  | 0      | 0      | 0     | 0      | 0     |       |
| 76,92  | 0      | 0      | 0     | 0      | 0     |       |
| 76,92  | 0      | 0      | 0     | 0      | 0     |       |
| Mean   | 234,1  | 87,21  | 269,4 | 154,6  | 84,39 | 37,31 |

| Tukey's multiple comparisons test         | Mean Diff. | 95.00% CI of diff. | Significant? | Summary | Adjusted P Value |
|-------------------------------------------|------------|--------------------|--------------|---------|------------------|
| Control vs. Colchicine                    | 146.9      | 71.57 to 222.2     | Yes          | ****    | <0.0001          |
| Control vs. NFL biot 10 µmol/l            | -35.3      | -113.5 to 42.9     | No           | ns      | 0.7903           |
| Control vs. NFL biot 20 µmol/l            | 79.45      | -4.987 to 163.9    | No           | ns      | 0.0787           |
| Control vs. NFL biot 40 µmol/l            | 149.7      | 68.02 to 231.4     | Yes          | ****    | <0.0001          |
| Control vs. NFL biot 60 µmol/l            | 196.8      | 111.3 to 282.3     | Yes          | ****    | <0.0001          |
| Colchicine vs. NFL biot 10 µmol/l         | -182.2     | -262.9 to -101.4   | Yes          | ****    | <0.0001          |
| Colchicine vs. NFL biot 20 µmol/l         | -67.41     | -154.2 to 19.39    | No           | ns      | 0.2299           |
| Colchicine vs. NFL biot 40 µmol/l         | 2.826      | -81.29 to 86.94    | No           | ns      | >0.9999          |
| Colchicine vs. NFL biot 60 µmol/l         | 49.91      | -37.91 to 137.7    | No           | ns      | 0.5824           |
| NFL biot 10 µmol/l vs. NFL biot 20 µmol/l | 114.8      | 25.41 to 204.1     | Yes          | **      | 0.0036           |
| NFL biot 10 µmol/l vs. NFL biot 40 µmol/l | 185        | 98.26 to 271.7     | Yes          | ****    | <0.0001          |
| NFL biot 10 µmol/l vs. NFL biot 60 µmol/l | 232.1      | 141.7 to 322.4     | Yes          | ****    | <0.0001          |
| NFL biot 20 µmol/l vs. NFL biot 40 µmol/l | 70.24      | -22.15 to 162.6    | No           | ns      | 0.2517           |
| NFL biot 20 µmol/l vs. NFL biot 60 µmol/l | 117.3      | 21.54 to 213.1     | Yes          | **      | 0.0066           |
| NFL biot 40 µmol/l vs. NFL biot 60 µmol/l | 47.08      | -46.27 to 140.4    | No           | ns      | 0.7012           |

| Size of sphere |            |                    |                    |                    |                    |
|----------------|------------|--------------------|--------------------|--------------------|--------------------|
| Control        | Colchicine | NFL biot 10 µmol/l | NFL biot 20 µmol/l | NFL biot 40 µmol/l | NFL biot 60 µmol/l |
| 38.67          | 46.5       | 222.62             | 145.12             | 87.03              | 86.74              |
| 159.54         | 50.72      | 196.62             | 90.32              | 78                 | 143.58             |
|                | 27.43      | 114.82             | 116.84             | 65.27              | 48.58              |
| 181.73         | 35.95      | 118.27             | 151.25             | 118                | 42.6               |
| 112.95         | 43.33      | 152.88             | 98.3               | 75.2               | 51.96              |
| 69.93          | 20.92      | 237.83             | 84.94              | 66.99              | 19.111             |
| 170.23         | 27.56      | 161.01             | 109.75             | 82.4               | 18.312             |
| 143.25         | 93.68      | 260.46             | 140.42             | 79.23              | 7.704              |
| 187.85         | 71.42      | 183.88             | 146.6              | 114.85             | 17.226             |
| 104.55         | 67.85      | 202.32             | 187.93             | 135.77             | 17.093             |
| 158.86         | 41.32      | 183.46             | 101.68             | 133.57             | 21.206             |
| 142.39         | 61.25      | 140.51             | 156.91             | 114.83             | 17.785             |
| 218.53         | 85.86      | 328.09             | 147.08             | 122.32             | 51.723             |
| 184.69         | 98.54      | 159.36             | 93.13              | 90.42              | 38.042             |
| 158.9          | 93.38      | 208.3              | 105.17             | 109.39             | 17.633             |
| 92.44          | 87.83      | 233.88             | 94.17              | 65.85              | 50.968             |
|                | 79.37      | 135.07             | 106.57             | 33.92              | 47.749             |
| 127.65         | 99.12      | 177.08             | 181.54             | 31.285             | 20.567             |
| 239.78         | 95.98      | 167.89             | 160.27             | 27.003             | 36.506             |
| 305.58         | 72.65      | 120.6              | 187.27             | 21.152             | 23.892             |
| 223.34         | 87.22      | 158.59             | 39.15              | 22.713             | 26.707             |
| 333.84         | 86.34      | 200.24             | 199.87             | 19.868             | 25.409             |
| 186.36         | 76.82      | 215.52             | 128.83             | 16.688             | 47.702             |
| 265.2          | 36.556     | 212.41             | 107.72             | 16.092             |                    |
| 62.46          | 24.821     | 186.38             | 81.864             | 23.244             |                    |
| 211.56         | 12.147     | 169.22             | 45.677             | 32.557             |                    |
| 258.99         | 12.865     | 224.62             | 43.391             | 13.697             |                    |
| 143.95         | 18.032     | 210.9              | 45.365             | 23.186             |                    |
| 374.35         | 13.973     | 208.22             | 68.937             | 27.55              |                    |
| 400.33         | 30.112     | 178.35             | 35.071             | 55.25              |                    |
| 406.65         | 18.959     | 320.27             | 116.284            | 32.299             |                    |
| 226.98         | 24.865     | 227.23             | 41.231             | 61.948             |                    |
| 100.42         | 25.501     | 72.351             | 59.403             | 70.116             |                    |
| 80.94          | 26.228     | 119.849            | 49.584             | 75.292             |                    |
| 109.41         | 25.3       | 67.313             | 37.15              | 18.075             |                    |
| 72.52          | 27.806     | 76.446             | 38.898             | 23.509             |                    |
| 91.37          | 24.484     | 69.135             | 52.018             | 57.676             |                    |
| 60.174         | 20.361     | 96.635             | 43.073             | 41.858             |                    |
| 86.223         | 19.483     | 68.363             | 72.795             | 59.642             |                    |
| 53.258         | 16.776     | 62.018             | 40.653             | 63.15              |                    |
| 100.056        | 22.921     | 79.877             | 47.654             | 40.711             |                    |
| 78.448         | 23.881     | 140.183            | 51.461             | 28.2               |                    |
| 79.89          | 22.806     | 70.246             | 57.752             | 32.723             |                    |
| 80.453         | 28.08      | 92.008             | 36.323             | 38.525             |                    |
| 101.233        | 58.709     | 89.307             | 49.308             | 40.856             |                    |
| 55             | 18.587     | 66.752             | 65.683             |                    |                    |
| 70.88          | 28.008     | 60.068             | 43.265             |                    |                    |
| 82.449         | 29.304     | 64.687             | 50.556             |                    |                    |
| 97.722         | 42.385     | 55.316             | 32.659             |                    |                    |
| 75.42          | 22.177     | 84.898             | 24.735             |                    |                    |
| 84.621         | 28.008     | 48.488             | 28.445             |                    |                    |
| 72.035         | 33.672     | 65.715             | 65.084             |                    |                    |
| 102.076        | 36.585     | 56.33              | 28.098             |                    |                    |
| 64.499         | 34.136     | 109.969            | 101.27             |                    |                    |
| 92.751         | 39.313     | 58.55              | 30.02              |                    |                    |
| 84.27          | 45.289     | 60.805             | 25.546             |                    |                    |
| 88.798         | 23.224     | 46.045             | 42.41              |                    |                    |
| 69.868         | 24.355     | 87                 | 107.423            |                    |                    |
| 96.792         | 23.974     | 88.8               | 38.037             |                    |                    |
| 107.003        | 31.993     | 116.679            | 49.278             |                    |                    |
| 19.856         | 22.623     | 402.168            | 218.515            |                    |                    |
| 90.315         | 25.87      | 71.87              | 51.198             |                    |                    |
| 88.913         | 32.268     | 94.433             | 83.62              |                    |                    |
| 84.514         | 27.564     | 98.108             | 29.806             |                    |                    |
| 84.816         |            | 89.822             | 21.759             |                    |                    |
| 55.441         |            | 66.153             | 53.976             |                    |                    |
| 162.615        |            | 127.268            | 35.322             |                    |                    |
| 132.288        |            | 121.249            | 34.64              |                    |                    |
| 114.323        |            | 90.393             | 122.439            |                    |                    |
| 86.855         |            | 16.294             | 28.305             |                    |                    |
| 105.531        |            | 152.175            | 45.678             |                    |                    |
| 71.635         |            | 109.778            | 47.123             |                    |                    |
| 77.873         |            | 71.868             | 33.914             |                    |                    |
| 117.556        |            | 25.254             | 75.75              |                    |                    |
| 233.211        |            | 62.113             | 63.197             |                    |                    |
| 23.597         |            | 53.387             | 23.042             |                    |                    |
| 64.182         |            | 47.582             |                    |                    |                    |
| 63.785         |            | 65.231             |                    |                    |                    |
| 54.247         |            | 113.703            |                    |                    |                    |
| 114.98         |            | 44.762             |                    |                    |                    |
| 101.123        |            | 61.113             |                    |                    |                    |
| 56.98          |            | 110.721            |                    |                    |                    |
| 45.245         |            | 46.49              |                    |                    |                    |
| 100.272        |            | 47.99              |                    |                    |                    |
| 99.701         |            | 42.09              |                    |                    |                    |
| 87.121         |            | 193.797            |                    |                    |                    |
| 112.799        |            | 49.125             |                    |                    |                    |
| 53.915         |            | 95.273             |                    |                    |                    |
| 31.372         |            | 67.868             |                    |                    |                    |
| 37.907         |            | 157.535            |                    |                    |                    |
| 126.565        |            |                    |                    |                    |                    |
| 45.245         |            |                    |                    |                    |                    |
| 78.992         |            |                    |                    |                    |                    |
| 131.522        |            |                    |                    |                    |                    |
| 93.147         |            |                    |                    |                    |                    |
| 100.148        |            |                    |                    |                    |                    |
| 79.255         |            |                    |                    |                    |                    |
| 42.882         |            |                    |                    |                    |                    |

|      |        |       |       |       |       |       |
|------|--------|-------|-------|-------|-------|-------|
|      | 39,88  |       |       |       |       |       |
|      | 42,831 |       |       |       |       |       |
|      | 89,638 |       |       |       |       |       |
|      | 75,142 |       |       |       |       |       |
|      | 74,133 |       |       |       |       |       |
|      | 25,794 |       |       |       |       |       |
|      | 33,73  |       |       |       |       |       |
| Mean | 115,4  | 41,49 | 124,3 | 77,57 | 57,51 | 38,21 |

| Tukey's multiple comparisons test         | Mean Diff. | 95.00% CI of diff. | Significant? | Summary | Adjusted P Value |
|-------------------------------------------|------------|--------------------|--------------|---------|------------------|
| Control vs. Colchicine                    | 73,87      | 46,72 to 101       | Yes          | ****    | <0,0001          |
| Control vs. NFL biot 10 µmol/l            | -8,934     | -33,55 to 15,68    | No           | ns      | 0,9044           |
| Control vs. NFL biot 20 µmol/l            | 37,79      | 11,99 to 63,58     | Yes          | ***     | 0,0005           |
| Control vs. NFL biot 40 µmol/l            | 57,85      | 27,37 to 88,33     | Yes          | ****    | <0,0001          |
| Control vs. NFL biot 60 µmol/l            | 77,15      | 37,81 to 116,5     | Yes          | ****    | <0,0001          |
| Colchicine vs. NFL biot 10 µmol/l         | -82,81     | -110,7 to -54,91   | Yes          | ****    | <0,0001          |
| Colchicine vs. NFL biot 20 µmol/l         | -36,09     | -65,03 to -7,145   | Yes          | **      | 0,0053           |
| Colchicine vs. NFL biot 40 µmol/l         | -16,02     | -49,21 to 17,16    | No           | ns      | 0,7375           |
| Colchicine vs. NFL biot 60 µmol/l         | 3,277      | -38,2 to 44,75     | No           | ns      | >0,9999          |
| NFL biot 10 µmol/l vs. NFL biot 20 µmol/l | 46,72      | 20,14 to 73,3      | Yes          | ****    | <0,0001          |
| NFL biot 10 µmol/l vs. NFL biot 40 µmol/l | 66,78      | 35,64 to 97,93     | Yes          | ****    | <0,0001          |
| NFL biot 10 µmol/l vs. NFL biot 60 µmol/l | 86,08      | 46,23 to 125,9     | Yes          | ****    | <0,0001          |
| NFL biot 20 µmol/l vs. NFL biot 40 µmol/l | 20,06      | -12,03 to 52,15    | No           | ns      | 0,473            |
| NFL biot 20 µmol/l vs. NFL biot 60 µmol/l | 39,36      | -1,235 to 79,96    | No           | ns      | 0,0634           |
| NFL biot 40 µmol/l vs. NFL biot 60 µmol/l | 19,3       | -24,43 to 63,03    | No           | ns      | 0,8044           |

| Cell adhesion |            |                    |                    |                    |                    |       |
|---------------|------------|--------------------|--------------------|--------------------|--------------------|-------|
| Control       | Colchicine | NFL biot 10 µmol/l | NFL biot 20 µmol/l | NFL biot 40 µmol/l | NFL biot 60 µmol/l |       |
| 405,468       | 336,6187   | 439,031            | 484,88             | 385,48             | 272,123            |       |
| 345,659       | 249,4327   | 360,191            | 457,469            | 359,939            | 268,698            |       |
| 465,57        | 113,7427   | 472,684            | 503,203            | 382,339            | 257,754            |       |
| 173,2877      | 146,498    | 236,2207           | 304,5767           | 408,2337           | 419,1597           |       |
| 274,7447      | 110,879    | 227,1657           | 379,2987           | 354,8917           | 332,8317           |       |
| 189,7417      | 108,697    | 197,3227           | 215,542            | 234,2787           | 285,5857           |       |
| 202,681       | 39,061     | 144,717            | 119,181            | 131,834            | 178,6              |       |
| 201,127       | 44,578     | 171,82             | 274,531            | 125,402            | 123,451            |       |
| 101,491       | 42,539     | 122,622            | 136,686            | 554,726            | 119,25             |       |
| 123,455       | 84,83      | 198,684            | 158,505            | 543,576            | 448,316            |       |
| 165,901       | 83,377     | 109,831            | 263,109            | 469,808            | 461,576            |       |
| 214,425       | 228,834    | 245,941            | 319,726            | 551,4              | 596,194            |       |
| 201,583       | 117,286    | 223,063            | 176,95             | 542,731            | 645,389            |       |
| 281,409       | 157,981    | 357,987            | 338,398            | 593,024            | 579,079            |       |
| 279,288       |            | 392,859            | 308,412            | 341,247            | 750,008            |       |
| 362,508       |            | 433,717            | 308,054            | 365,227            | 417,546            |       |
| 429,073       |            |                    |                    | 389,751            | 438,961            |       |
| Mean          | 259,8      | 133,2              | 270,9              | 296,8              | 396,1              | 393,1 |

| Tukey's multiple comparisons test         | Mean Diff. | 95.00% CI of diff. | Significant? | Summary | Adjusted P Value |
|-------------------------------------------|------------|--------------------|--------------|---------|------------------|
| Control vs. Colchicine                    | 126,7      | -10,53 to 263,9    | No           | ns      | 0,0876           |
| Control vs. NFL biot 10 µmol/l            | -11,02     | -143,4 to 121,4    | No           | ns      | 0,9999           |
| Control vs. NFL biot 20 µmol/l            | -36,93     | -169,4 to 95,49    | No           | ns      | 0,9647           |
| Control vs. NFL biot 40 µmol/l            | -136,3     | -266,7 to -5,861   | Yes          | *       | 0,0352           |
| Control vs. NFL biot 60 µmol/l            | -133,3     | -261,9 to -4,724   | Yes          | *       | 0,0376           |
| Colchicine vs. NFL biot 10 µmol/l         | -137,7     | -276,8 to 1,436    | No           | ns      | 0,0541           |
| Colchicine vs. NFL biot 20 µmol/l         | -163,6     | -302,7 to -24,48   | Yes          | *       | 0,0116           |
| Colchicine vs. NFL biot 40 µmol/l         | -262,9     | -400,2 to -125,7   | Yes          | ****    | <0,0001          |
| Colchicine vs. NFL biot 60 µmol/l         | -260       | -395,5 to -124,5   | Yes          | ****    | <0,0001          |
| NFL biot 10 µmol/l vs. NFL biot 20 µmol/l | -25,92     | -160,3 to 108,5    | No           | ns      | 0,9932           |
| NFL biot 10 µmol/l vs. NFL biot 40 µmol/l | -125,2     | -257,7 to 7,179    | No           | ns      | 0,0747           |
| NFL biot 10 µmol/l vs. NFL biot 60 µmol/l | -122,3     | -252,9 to 8,345    | No           | ns      | 0,0801           |
| NFL biot 20 µmol/l vs. NFL biot 40 µmol/l | -99,33     | -231,8 to 33,1     | No           | ns      | 0,2556           |
| NFL biot 20 µmol/l vs. NFL biot 60 µmol/l | -96,37     | -227 to 34,26      | No           | ns      | 0,2728           |
| NFL biot 40 µmol/l vs. NFL biot 60 µmol/l | 2,961      | -125,6 to 131,5    | No           | ns      | >0,9999          |

| Differentiation - FACS |         |               |               |
|------------------------|---------|---------------|---------------|
| CD90                   |         |               |               |
|                        | Control | NFL 20 µmol/l | NFL 60 µmol/l |
| Proliferative medium   | 0,01    | 4,1           | 9,14          |
|                        | 0,02    | 2,56          | 27,22         |
|                        | 0,17    | 4,33          | 26,72         |
|                        | 0,13    |               | 9,48          |
|                        | 20,7    |               |               |
| Mean                   | 0,0825  | 3,663         | 18,65         |
|                        |         |               |               |
| Conditionned medium    | 2,2     | 6,6           | 27,58         |
|                        | 0,28    | 15,58         | 19,82         |
|                        | 1,4     | 26,75         |               |
|                        | 5       | 12,25         | 33,74         |
|                        | 27,05   |               |               |
| Mean                   | 2,22    | 15,3          | 27,05         |

| Tukey's multiple comparisons test | Mean Diff. | 95.00% CI of diff. | Significant? | Summary | Adjusted P Value |
|-----------------------------------|------------|--------------------|--------------|---------|------------------|
| Proliferative medium              |            |                    |              |         |                  |
| Control vs. NFL                   | -3,581     | -15,65 to 8,486    | No           | ns      | 0,7311           |
| Control vs. NFL                   | -18,57     | -29,17 to -7,971   | Yes          | ***     | 0,0009           |
| NFL vs. NFL                       | -14,99     | -26,53 to -3,45    | Yes          | *       | 0,0104           |
| Conditionned medium               |            |                    |              |         |                  |
| Control vs. NFL                   | -13,08     | -24,25 to -1,903   | Yes          | *       | 0,0208           |
| Control vs. NFL                   | -24,83     | -36,89 to -12,76   | Yes          | ***     | 0,0002           |
| NFL vs. NFL                       | -11,75     | -23,82 to 0,3154   | No           | ns      | 0,057            |

| Sidak's multiple comparisons test          | Mean Diff. | 95.00% CI of diff. | Significant? | Summary | Adjusted P Value |
|--------------------------------------------|------------|--------------------|--------------|---------|------------------|
| Proliferative medium - Conditionned medium |            |                    |              |         |                  |
| Control                                    | -2,138     | -13,66 to 9,389    | No           | ns      | 0,9493           |
| NFL                                        | -11,63     | -24,08 to 0,8186   | No           | ns      | 0,071            |
| NFL                                        | -8,395     | -20,3 to 3,51      | No           | ns      | 0,2196           |

| A2B5                 |         |               |               |
|----------------------|---------|---------------|---------------|
|                      | Control | NFL 20 µmol/l | NFL 60 µmol/l |
| Proliferative medium | 0.76    | 2.03          | 24.31         |
|                      | 0.76    | 7.39          | 40.02         |
|                      | 2.06    | 2.69          | 26.3          |
| Mean                 | 1,193   | 4,037         | 30,21         |
| Conditionned medium  | 1       | 30,76         | 23,93         |
|                      | 7,17    | 18,54         | 37,99         |
|                      | 8,61    | 16,54         | 23,69         |
| Mean                 | 5,593   | 21,95         | 28,54         |

| Tukey's multiple comparisons test | Mean Diff. | 95.00% CI of diff. | Significant? | Summary | Adjusted P Value |
|-----------------------------------|------------|--------------------|--------------|---------|------------------|
| Proliferative medium              |            |                    |              |         |                  |
| Control vs. NFL                   | -2,843     | -16,18 to 10,49    | No           | ns      | 0,8389           |
| Control vs. NFL                   | -29,02     | -42,35 to -15,68   | Yes          | ***     | 0,0002           |
| NFL vs. NFL                       | -26,17     | -39,51 to -12,84   | Yes          | ***     | 0,0006           |
| Conditionned medium               |            |                    |              |         |                  |
| Control vs. NFL                   | -16,35     | -29,69 to -3,017   | Yes          | *       | 0,017            |
| Control vs. NFL                   | -22,94     | -36,28 to -9,607   | Yes          | **      | 0,0017           |
| NFL vs. NFL                       | -6,59      | -19,93 to 6,747    | No           | ns      | 0,4123           |

| Sidak's multiple comparisons test          | Mean Diff. | 95.00% CI of diff. | Significant? | Summary | Adjusted P Value |
|--------------------------------------------|------------|--------------------|--------------|---------|------------------|
| Proliferative medium - Conditionned medium |            |                    |              |         |                  |
| Control                                    | -4,4       | -18,25 to 9,449    | No           | ns      | 0,7797           |
| NFL                                        | -17,91     | -31,76 to -4,061   | Yes          | *       | 0,0112           |
| NFL                                        | 1,673      | -12,18 to 15,52    | No           | ns      | 0,9831           |

| O4                   |         |               |               |
|----------------------|---------|---------------|---------------|
|                      | Control | NFL 20 µmol/l | NFL 60 µmol/l |
| Proliferative medium | 0.35    | 11.5          | 19.56         |
|                      | 1.99    | 14.2          | 30.6          |
|                      | 0.2     | 5.71          | 22.04         |
| Mean                 | 0,8467  | 10,47         | 24,07         |
| Conditionned medium  | 0,88    | 19,59         | 42,47         |
|                      | 3,38    | 16,88         | 65,92         |
|                      | 7,6     | 21,62         | 49,51         |
| Mean                 | 3,953   | 19,36         | 52,63         |

| Tukey's multiple comparisons test | Mean Diff. | 95.00% CI of diff. | Significant? | Summary | Adjusted P Value |
|-----------------------------------|------------|--------------------|--------------|---------|------------------|
| Proliferative medium              |            |                    |              |         |                  |
| Control vs. NFL                   | -9,623     | -22,67 to 3,426    | No           | ns      | 0,1628           |
| Control vs. NFL                   | -23,22     | -36,27 to -10,17   | Yes          | **      | 0,0013           |
| NFL vs. NFL                       | -13,6      | -26,65 to -0,547   | Yes          | *       | 0,041            |
| Conditionned medium               |            |                    |              |         |                  |
| Control vs. NFL                   | -15,41     | -28,46 to -2,36    | Yes          | *       | 0,0212           |
| Control vs. NFL                   | -48,68     | -61,73 to -35,63   | Yes          | ****    | <0,0001          |
| NFL vs. NFL                       | -33,27     | -46,32 to -20,22   | Yes          | ****    | <0,0001          |

| Sidak's multiple comparisons test          | Mean Diff. | 95.00% CI of diff. | Significant? | Summary | Adjusted P Value |
|--------------------------------------------|------------|--------------------|--------------|---------|------------------|
| Proliferative medium - Conditionned medium |            |                    |              |         |                  |
| Control                                    | -3,107     | -16,66 to 10,44    | No           | ns      | 0,9009           |
| NFL                                        | -8,893     | -22,44 to 4,657    | No           | ns      | 0,2565           |
| NFL                                        | -28,57     | -42,12 to -15,02   | Yes          | ***     | 0,0002           |

| Differentiation - qPCR |          |           |                   |           |          |      |
|------------------------|----------|-----------|-------------------|-----------|----------|------|
| Stem cells markers     |          |           |                   |           |          |      |
| NFL Biot 20 mol/l      |          |           | NFL Biot 60 mol/l |           |          |      |
| CD133                  | NESTIN   | SOX2      | CD133             | NESTIN    | SOX2     |      |
| 0,6113201              | 1,71119  | 1,29684   | 0,2726269         | 0,9075192 | 0,528509 |      |
| 0,2952482              | 1,283426 | 0,8438158 | 0,31              | 1,47      | 1,39     |      |
| 0,69                   | 1,43     | 1,29      | 0,3977682         | 0,99      | 1,05     |      |
| 0,61                   | 1,92     | 1,58      |                   | 1,079228  | 1,552938 |      |
| 0,4537596              | 1,771535 | 1,469169  |                   |           |          |      |
| Mean                   | 0,5321   | 1,623     | 1,296             | 0,3268    | 1,112    | 1,13 |

| Sidak's multiple comparisons test     | Mean Diff. | 95.00% CI of diff. | Significant? | Summary | Adjusted P Value |
|---------------------------------------|------------|--------------------|--------------|---------|------------------|
| NFL Biot 20 mol/l - NFL Biot 60 mol/l |            |                    |              |         |                  |
| CD133                                 | 0,2053     | -0,3147 to 0,7252  | No           | ns      | 0,6801           |
| Nestin                                | 0,5115     | 0,03396 to 0,9891  | Yes          | *       | 0,0335           |
| Sox2                                  | 0,1656     | -0,312 to 0,6432   | No           | ns      | 0,7584           |

| Neuronal markers  |           |           |                   |           |           |        |
|-------------------|-----------|-----------|-------------------|-----------|-----------|--------|
| NFL Biot 20 mol/l |           |           | NFL Biot 60 mol/l |           |           |        |
| TUBBIII           | DCX       | NCAM      | TUBBIII           | DCX       | NCAM      |        |
| 0,7295102         | 0,7955365 | 1,101905  | 2,305373          | 3,944931  | 1,898684  |        |
| 0,8321987         | 0,9592641 | 0,8207416 | 0,8379871         | 0,6439408 | 0,2474142 |        |
| 0,94              | 1,82      | 0,94      | 1,6               | 3,25      | 0,97      |        |
| 1,62              | 1,41      | 0,83      | 3,34              | 0,72      | 0,35      |        |
| 0,9760318         | 1,618884  | 0,8555951 | 2,73208           | 1,972465  | 1,209994  |        |
| Mean              | 1,02      | 1,321     | 0,9096            | 2,163     | 2,106     | 0,9352 |

| Sidak's multiple comparisons test       | Mean Diff. | 95.00% CI of diff. | Significant? | Summary | Adjusted P Value |
|-----------------------------------------|------------|--------------------|--------------|---------|------------------|
| NFL Biot 20 mol/l vs. NFL Biot 60 mol/l |            |                    |              |         |                  |
| BIII                                    | -1,144     | -48,23 to 45,94    | No           | ns      | >0,9999          |
| DCX                                     | -0,7855    | -47,87 to 46,3     | No           | ns      | >0,9999          |
| NCAM                                    | -0,02557   | -47,11 to 47,06    | No           | ns      | >0,9999          |

| Astrocyte markers |           |           |                   |          |           |        |
|-------------------|-----------|-----------|-------------------|----------|-----------|--------|
| NFL Biot 20 mol/l |           |           | NFL Biot 60 mol/l |          |           |        |
| GFAP              | CD44      | GLAST     | GFAP              | CD44     | GLAST     |        |
| 3,000078          | 0,9043794 | 0,6574714 | 220,5558          | 4,958831 | 0,1587689 |        |
| 26,72281          | 0,7144971 | 0,2773924 | 63,77858          | 2,34567  | 0,5       |        |
| 28,2465           | 1,21      | 0,95      |                   | 4,01     | 0,28      |        |
|                   | 0,9       | 0,92      |                   | 5,53     | 0,2822411 |        |
|                   | 1,574616  | 0,823591  |                   | 6,04189  |           |        |
| Mean              | 19,32     | 1,061     | 0,7257            | 142,2    | 4,577     | 0,3053 |

| Sidak's multiple comparisons test     | Mean Diff. | 95.00% CI of diff. | Significant? | Summary | Adjusted P Value |
|---------------------------------------|------------|--------------------|--------------|---------|------------------|
| NFL Biot 20 mol/l - NFL Biot 60 mol/l |            |                    |              |         |                  |
| GFAP                                  | -122,8     | -186,6 to -59,05   | Yes          | ***     | 0,0002           |
| CD44                                  | -3,517     | -47,72 to 40,68    | No           | ns      | 0,9956           |



|                                       |           |                |                    |              |         |                  |
|---------------------------------------|-----------|----------------|--------------------|--------------|---------|------------------|
| GLAST                                 | 0,4204    | -46,46 to 47,3 | No                 | ns           | >0,9999 |                  |
| <b>Oligodendrocyte markers</b>        |           |                |                    |              |         |                  |
| NFL Biot 20 mol/l                     |           |                | NFL Biot 60 mol/l  |              |         |                  |
| GALC                                  | CNP       | GALC           | CNP                |              |         |                  |
| 1,082975                              | 0,5605831 | 0,27           | 1,526259           |              |         |                  |
|                                       | 0,5843886 | 0,48           | 0,5140569          |              |         |                  |
| 1,16                                  | 1,05      | 0,4475125      | 0,94               |              |         |                  |
| 1,1                                   | 1,09      |                | 0,83               |              |         |                  |
| 0,9233823                             | 1,144724  |                | 0,8122524          |              |         |                  |
| Mean                                  | 1,067     | 0,8859         | 0,3992             |              |         |                  |
| Sidak's multiple comparisons test     |           |                |                    |              |         |                  |
| NFL Biot 20 mol/l - NFL Biot 60 mol/l |           | Mean Diff.     | 95,00% CI of diff. | Significant? | Summary | Adjusted P Value |
| GALC                                  |           | 0,6674         | 0,1484 to 1,186    | Yes          | *       | 0,0127           |
| CNP                                   |           | -0,03857       | -0,4683 to 0,3912  | No           | ns      | 0,9691           |
